# Supplementary material for: Monoclonal antibodies constructed from COVID-19 convalescent memory B cells exhibit potent binding activity to MERS-CoV spike S2 subunit and other human coronaviruses
Source: PubMed Central journal article supplement (PMC9813381; doi:10.3389/fimmu.2022.1056272), 2022-12-22
Supplement: Presentation_3.pdf [file Presentation_3.pdf]

760 770 780 790 800  
MERS-COV RSVPGMRLASIAFNHPIVDQLNSS.YFKLSIPTNFSFGVTQEXYQTIIQKVTVDCKQY  
SARS-COV-2 SVASQSI IAYTMSLGAENSVAYSNN...SIAIPNFTISVTIELPVSMTKTSVDCITMY  
SARS-COV STSQKSI VAYTMSLGDSS IAYSNN...TIAIPNFSISITTEVMPVSMKTSVDCITMY  
OC43 ITTGYRFTNFEPFTVNSVNDLSLEPVGGLYEIQIPSEFTIGNMPEFIQTSSPKVTIDCAAF  
HKU1 ISSPYRFTFEPFNVSFVNDVSVETVGLLFEIQIPNFTIAGHEPFIQTSSPKVTIDCSAF  
229E YDSVSAIVTAN.....LSTPSNWTTSVOVEXLQITSKPIVVDCASTY  
NL63 DNGISALITAN.....LSTPSNWTTSVOVEXLQITSTPEIVVDCASTY

810 820 830 840 850 860  
MERS-COV VCGGDFEQLELREYGFCSKINQALHGANLRQDDSVRNDFASVKS.....SQSSPIIF  
SARS-COV-2 ICGDSTEC SNLTLQYGSFCTQLNRALTGIAVEQDKNTQEVFAQVKS.....IYKTEPIK  
SARS-COV ICGDSTEC ANLTLQYGSFCTQLNRALSGIAAEQDRNRTREVFVAQVKS.....MYKTEPIK  
OC43 VCGDYAAKCLQLEVEYGFCDNINALETEVNELELDTIQLVANS LMNGVTLSTKLKDVGNF  
HKU1 VCSNYAAVCHDLESEYGFCDNINALETEVNELELDTIQLVANS LMNGVTLSTKLKDVGNF  
229E VCSNYAAVCHDLESEYGFCDNINALETEVNELELDTIQLVANS LMNGVTLSTKLKDVGNF  
NL63 VCSNYAAVCHDLESEYGFCDNINALETEVNELELDTIQLVANS LMNGVTLSTKLKDVGNF

P/887-904

870 880 890 900 910 920  
MERS-COV GFGDFENLTLLEFPVSI STGSRARSALIEDLDFKVTIADPG.YMQGYDDCMQGGPASARD  
SARS-COV-2 DFGDFENLTLLEFPVSI STGSRARSALIEDLDFKVTIADPG.YMQGYDDCMQGGPASARD  
SARS-COV YFGDFENLTLLEFPVSI STGSRARSALIEDLDFKVTIADPG.YMQGYDDCMQGGPASARD  
OC43 NVDDINRFPVVLGCLGSECSKSSRSALIEDLDFKVTIADPG.YMQGYDDCMQGGPASARD  
HKU1 DVDNIDFKSLLGCLGSECSKSSRSALIEDLDFKVTIADPG.YMQGYDDCMQGGPASARD  
229E SFGDYNLSSVIFSLPRSGSRVAGRSALIEDLDFKVTIADPG.YMQGYDDCMQGGPASARD  
NL63 SFGDYNLSSVIFSLPRSGSRVAGRSALIEDLDFKVTIADPG.YMQGYDDCMQGGPASARD

P/920-938

930 940 950 960 970 980  
MERS-COV LICAOYVAGYKVLPLMVDNMEAAVYSSLLGSIAGVGNWAGLSSFAAIPFAQSI FVRRNG  
SARS-COV-2 LICAOYVAGYKVLPLMVDNMEAAVYSSLLGSIAGVGNWAGLSSFAAIPFAQSI FVRRNG  
SARS-COV LICAOYVAGYKVLPLMVDNMEAAVYSSLLGSIAGVGNWAGLSSFAAIPFAQSI FVRRNG  
OC43 LICAOYVAGYKVLPLMVDNMEAAVYSSLLGSIAGVGNWAGLSSFAAIPFAQSI FVRRNG  
HKU1 LICAOYVAGYKVLPLMVDNMEAAVYSSLLGSIAGVGNWAGLSSFAAIPFAQSI FVRRNG  
229E LICAOYVAGYKVLPLMVDNMEAAVYSSLLGSIAGVGNWAGLSSFAAIPFAQSI FVRRNG  
NL63 LICAOYVAGYKVLPLMVDNMEAAVYSSLLGSIAGVGNWAGLSSFAAIPFAQSI FVRRNG

P/978-1002

990 1000 1010 1020  
MERS-COV VGITQNVLSENOQLIANEFNKALGAMQGTFT.....TTNEAFQKVDVAVNN  
SARS-COV-2 IGVTVNVLSENOQLIANEFNKALGAMQGTFT.....TTNEAFQKVDVAVNN  
SARS-COV IGVTVNVLSENOQLIANEFNKALGAMQGTFT.....TTNEAFQKVDVAVNN  
OC43 LGVTMDVLENOQLIANEFNKALGAMQGTFT.....TTNEAFQKVDVAVNN  
HKU1 LGVTMDVLENOQLIANEFNKALGAMQGTFT.....TTNEAFQKVDVAVNN  
229E VALQTDVLENOQLIANEFNKALGAMQGTFT.....TTNEAFQKVDVAVNN  
NL63 VALQTDVLENOQLIANEFNKALGAMQGTFT.....TTNEAFQKVDVAVNN

P/1030-1048

P/1044-1062

1030 1040 1050 1060 1070 1080  
MERS-COV NAAQLNKLASELSSNTFGAISASIGDIQRLLDVEQDAQDRLINGRLLTALNAFVAQOIVR  
SARS-COV-2 NAAQLNKLASELSSNTFGAISASIGDIQRLLDVEQDAQDRLINGRLLTALNAFVAQOIVR  
SARS-COV NAAQLNKLASELSSNTFGAISASIGDIQRLLDVEQDAQDRLINGRLLTALNAFVAQOIVR  
OC43 NAAQLNKLASELSSNTFGAISASIGDIQRLLDVEQDAQDRLINGRLLTALNAFVAQOIVR  
HKU1 NAAQLNKLASELSSNTFGAISASIGDIQRLLDVEQDAQDRLINGRLLTALNAFVAQOIVR  
229E NAAQLNKLASELSSNTFGAISASIGDIQRLLDVEQDAQDRLINGRLLTALNAFVAQOIVR  
NL63 NAAQLNKLASELSSNTFGAISASIGDIQRLLDVEQDAQDRLINGRLLTALNAFVAQOIVR

P/1096-1120

1090 1100 1110 1120 1130 1140  
MERS-COV SESAAALSAQAARDKVNCEVKAQSRSGFCGQGTHTVSEFVFNAPNGLYFMHVGYYPNSHIE  
SARS-COV-2 AAERIRASANAATKMSCEVLDGQSKRVDFCGKGYHLMSPQAPAGHVVEFHVTVYVPAQENK  
SARS-COV AAERIRASANAATKMSCEVLDGQSKRVDFCGKGYHLMSPQAPAGHVVEFHVTVYVPAQENK  
OC43 STLKVFSAQAAMEKVNCEVKSQSSRINFCCGNGNHLISLVQNAFYGLVEIFHFNYVPTKYVT  
HKU1 IITLKAGASRAIEKVNCEVKSQSSRINFCCGNGNHLISLVQNAFYGLVEIFHFNYVPTKYVT  
229E YTEVRASRQAQQKVNCEVKSQSSRINFCCGNGNHLISLVQNAFYGLVEIFHFNYVPTKYVT  
NL63 YTEVRSSRRLAQQKVNCEVKSQSSRINFCCGNGNHLISLVQNAFYGLVEIFHFNYVPTKYVT

1150 1160 1170 1180 1190 1200  
MERS-COV VVSAYGLCDANPTNCTAPVNGYFKTNTRIVDEWSYTGSSFYAPPEPITSLNITKYVAPQC  
SARS-COV-2 FTTAPAIHDG.KAHFPREG..VFSNGTH.....WFVTRQNFYEPQIITTDNTFVSGNC  
SARS-COV FTTAPAIHDG.KAHFPREG..VFSNGTH.....WFVTRQNFYEPQIITTDNTFVSGNC  
OC43 AKVSPGLCIAENRGIAPKSG..YFVNVTNT.....WMTGSSYYYPPEPITTDNTFVSGNC  
HKU1 VLVSPGLCLSDGRGIAPKSG..YFVNVTNT.....WMTGSSYYYPPEPITTDNTFVSGNC  
229E VEAWSPGLCLSDGRGIAPKSG..YFVNVTNT.....WMTGSSYYYPPEPITTDNTFVSGNC  
NL63 VKAWSPGLCLSDGRGIAPKSG..YFVNVTNT.....WMTGSSYYYPPEPITTDNTFVSGNC

P/1229-1243

1210 1220 1230 1240 1250 1260  
MERS-COV VTYQNI STNLP PPL LGNSTGIDDFELDEFKKNVSTISIPNFGSLTQINTL LLDLTYEMLS  
SARS-COV-2 DVVIGINNTVYDPLQPELDSFKELDKYFKNHTSPDVLGDGISGINASVVNIQKELDR  
SARS-COV DVVIGINNTVYDPLQPELDSFKELDKYFKNHTSPDVLGDGISGINASVVNIQKELDR  
OC43 AVNYTKAPYVMLNTP.NLSDFKELDKYFKNHTSPDVLGDGISGINASVVNIQKELDR  
HKU1 SVNFTKAPFIYLNNSIP.NLSDFKELDKYFKNHTSPDVLGDGISGINASVVNIQKELDR  
229E NVTFVNI SRSELQTI VE.EYIDVKNKLOELSYKLPNIYVDPDLVVEQYNQITLNLSTBIIST  
NL63 NVTFVNI SRSELQTI VE.EYIDVKNKLOELSYKLPNIYVDPDLVVEQYNQITLNLSTBIIST

1270 1280 1290 1300 1310  
MERS-COV LQ.....VVKALNESYTDLKEELGNYTYNKKPWWIWLGFAGLVALALCV  
SARS-COV-2 LN.....EVAKNLESLELDLQELGKYEQYIKKPPWWIWLGFAGLVAIVMT  
SARS-COV LN.....EVAKNLESLELDLQELGKYEQYIKKPPWWIWLGFAGLVAIVMT  
OC43 LQ.....EAIKVLNHSYINLKDIDGTYEYVKKPWWIWLGLIAGVAMLVLL  
HKU1 IQ.....ESIKLSNSSFINKREIGTYEYVKKPWWIWLGLIAGVAMLVLL  
229E LENKSAELNYTVKQLQTLIDNINSLVLDLKWLNRYEYVKKPWWIWLGLIAGVAMLVLL  
NL63 LEAKTASLFQTVVLELQGLIDQINSLVLDLKWLNRYEYVKKPWWIWLGLIAGVAMLVLL

1320 1330 1340 1350  
MERS-COV FFLCCFTGCGSNMCMGKLCNRCDRYEEYDLEPHKVVH...  
SARS-COV-2 IMLCCTGCGSCSLKGCSCGSCCFDEDDSEFVVKGVKLYHT  
SARS-COV ILLCCFTGCGSCSLKGCSCGSCCFDEDDSEFVVKGVKLYHT  
OC43 FFLCCFTGCGSCSCFCKCGG..CCDDYTGQELVICTSHDD..  
HKU1 FFLCCFTGCGSCSACFSKCHN..CCDEYGGHNDFFVYKASHDD..  
229E LLCCCTGCGSCCFSCFASIKGCES..TKLPYDVEKIKHIQ  
NL63 VFLCCFTGCGSCCNCLTSSMRGCDGCGSTKLPYVEFKVVHVO
